# Supplementary material
Source: Research Square preprint supplement (doi:10.21203/rs.3.rs-8743981/v1)
Supplement: Supplementary file 1 [file 016eb1ece2b2d1ef33e829cb.docx]

**Supplemental table 1:** Characteristics of the population by modules

*This table provides a detailed description of the sociodemographic and professional characteristics of respondents included in each module-specific analytical sample. Results are reported as absolute numbers, with percentages shown in parentheses.*

|  | **MOD1: CRITERIA** | **MOD2: VARIANTS** | **MOD3/4: NGS/INFO** |
| --- | --- | --- | --- |
| Total | N = 1,0771 | N = 8741 | N = 7511 |
| **Professional profile** | | | |
| **Medical specialty** |  |  |  |
| Genetic counselling | 66 (6.1%) | 62 (7.1%) | 56 (7.5%) |
| Gynaecology | 124 (12%) | 94 (11%) | 83 (11%) |
| Medical genetics | 119 (11%) | 111 (13%) | 102 (14%) |
| Midwifery | 262 (24%) | 195 (22%) | 148 (20%) |
| Paediatrics | 462 (43%) | 375 (43%) | 329 (44%) |
| Other | 44 (4.1%) | 37 (4.2%) | 33 (4.4%) |
| Career experience |  |  |  |
| Junior | 242 (23%) | 194 (22%) | 169 (23%) |
| Mid-level | 472 (44%) | 379 (43%) | 325 (43%) |
| Senior | 360 (34%) | 299 (34%) | 256 (34%) |
| Missing | 3 | 2 | 1 |
| Clinical involvement |  |  |  |
| **Manages rare disease patients** |  |  |  |
| No | 376 (45%) | 286 (44%) | 232 (42%) |
| Yes | 453 (55%) | 361 (56%) | 315 (58%) |
| Missing | 248 | 227 | 204 |
| **Role of NBS in practice** |  |  |  |
| Never | 268 (26%) | 220 (26%) | 191 (26%) |
| More than once a year | 123 (12%) | 106 (13%) | 95 (13%) |
| More than once per quarter | 106 (10%) | 92 (11%) | 86 (12%) |
| More than once per month | 172 (17%) | 135 (16%) | 112 (15%) |
| More than once per week | 369 (36%) | 291 (34%) | 239 (33%) |
| Missing | 39 | 30 | 28 |
| Academic activities |  |  |  |
| **Teaching activity** |  |  |  |
| No | 689 (64%) | 533 (61%) | 444 (60%) |
| Yes | 381 (36%) | 335 (39%) | 301 (40%) |
| Missing | 7 | 6 | 6 |
| **Research activity** |  |  |  |
| No | 816 (76%) | 642 (74%) | 541 (73%) |
| Yes | 254 (24%) | 225 (26%) | 203 (27%) |
| Missing | 7 | 7 | 7 |
| **Practice environment** | | | |
| Place of practice |  |  |  |
| **University Hospital** |  |  |  |
| No | 539 (50%) | 416 (48%) | 357 (48%) |
| Yes | 538 (50%) | 458 (52%) | 394 (52%) |
| **Public Hospital (non-university)** |  |  |  |
| No | 826 (77%) | 675 (77%) | 583 (78%) |
| Yes | 251 (23%) | 199 (23%) | 168 (22%) |
| **Private sector** |  |  |  |
| No | 972 (90%) | 796 (91%) | 680 (91%) |
| Yes | 105 (9.7%) | 78 (8.9%) | 71 (9.5%) |
| **Community practice** |  |  |  |
| No | 825 (77%) | 683 (78%) | 588 (78%) |
| Yes | 252 (23%) | 191 (22%) | 163 (22%) |
| **Other settings** |  |  |  |
| No | 1,006 (93%) | 818 (94%) | 703 (94%) |
| Yes | 71 (6.6%) | 56 (6.4%) | 48 (6.4%) |
| Practice type |  |  |  |
| Exclusively private practice | 201 (19%) | 148 (17%) | 128 (17%) |
| Mixed (private and salaried) | 95 (8.8%) | 78 (8.9%) | 65 (8.7%) |
| Exclusively salaried | 781 (73%) | 648 (74%) | 558 (74%) |
| Main region of practice |  |  |  |
| Paris / Île-de-France | 185 (17%) | 153 (18%) | 128 (17%) |
| North-East | 222 (21%) | 181 (21%) | 154 (21%) |
| North-West | 160 (15%) | 130 (15%) | 118 (16%) |
| Overseas territories | 61 (5.7%) | 48 (5.5%) | 46 (6.1%) |
| South-East | 241 (22%) | 197 (23%) | 166 (22%) |
| South-West | 208 (19%) | 165 (19%) | 139 (19%) |
| **Genetics-related practice** | | | |
| Experience in genetics practice |  |  |  |
| No | 450 (44%) | 346 (42%) | 288 (41%) |
| Yes | 567 (56%) | 477 (58%) | 419 (59%) |
| Missing | 60 | 51 | 44 |
| Has prescribed genetic tests |  |  |  |
| No | 237 (23%) | 174 (21%) | 133 (19%) |
| Yes | 780 (77%) | 649 (79%) | 574 (81%) |
| Missing | 60 | 51 | 44 |
| **Personal characteristics** | | | |
| Age |  |  |  |
| Under 35 | 334 (31%) | 260 (30%) | 223 (30%) |
| 35-49 | 426 (40%) | 346 (40%) | 297 (40%) |
| 50+ | 308 (29%) | 259 (30%) | 224 (30%) |
| Missing | 9 | 9 | 7 |
| Number of children |  |  |  |
| None | 290 (28%) | 234 (28%) | 203 (28%) |
| One child | 141 (14%) | 104 (12%) | 92 (13%) |
| Two children | 305 (29%) | 248 (29%) | 205 (28%) |
| Three children | 232 (22%) | 196 (23%) | 171 (24%) |
| More than three | 75 (7.2%) | 60 (7.1%) | 54 (7.4%) |
| Missing | 34 | 32 | 26 |
| Gender |  |  |  |
| Men | 208 (20%) | 180 (21%) | 169 (23%) |
| Women | 856 (80%) | 684 (79%) | 574 (77%) |
| Missing | 13 | 10 | 8 |

1n (%)
